# Supplementary material for: Catalysed stereodivergent hydrosilylation with Onium Salts stabilised M(0) nanocatalysts prepared in scCO2
Source: Royal Society of Chemistry journal article supplement (doi:10.1039/c4ra09881a), 2014-01-01

## Supplementary information

### **Catalyzed stereodivergent hydrosilylation with Onium Salts stabilized M(0) Nanocatalysts prepared in scCO<sub>2</sub>**

Oana Pascu<sup>†</sup>, Virginie Liautard<sup>‡</sup>, Michel Vaultier<sup>‡</sup>, Mathieu Pucheault<sup>\*\*‡</sup>, Cyril Aymonier<sup>1\*,†</sup>

<sup>†</sup>CNRS, Université de Bordeaux, ICMCB, UPR 9048, F-33600 Pessac, France,

<sup>‡</sup>ISM, UMP, CNRS 5255, Université de Bordeaux 1, F-33405 Talence, France

#### **Materials Characterization.**

Powder XRD analysis on the above mentioned systems were performed using an X-ray diffractometer with Cu  $\lambda_{K\alpha}$  radiation (PANalytical X'Pert Pro). For FTIR reflection measurements was used a Bruker spectrophotometer working in the range 7500-400 cm<sup>-1</sup>.

#### **Onim Salts with liquid crystal behavior during metal nanocrystals synthesis**

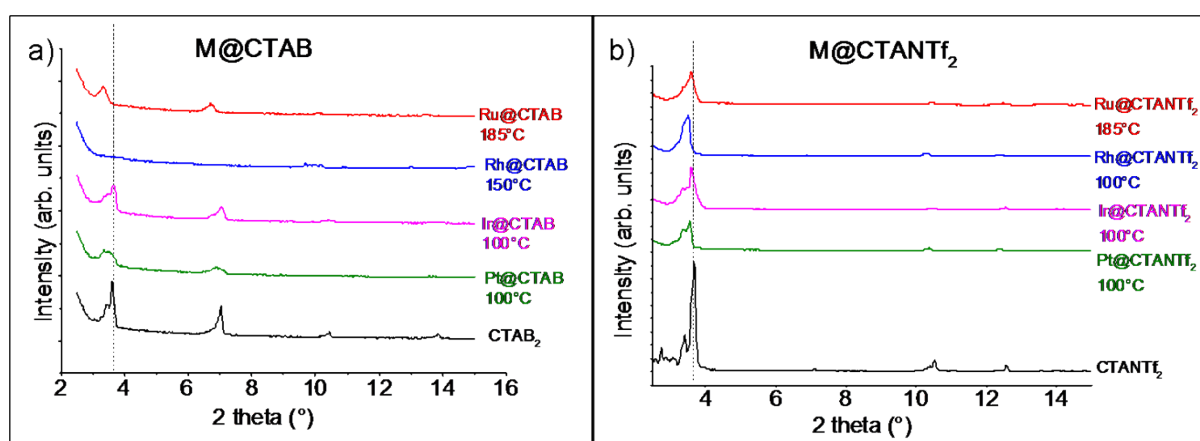

**Figure 1S.** XRD spectra of the systems M behaving as thermotropic liquid crystals showing a broader peak at low angle ( 2theta of 3.6 degree) compared with the pristine ionic salt

At the end of reaction, these liquid crystals will have an isotropic form, but still retaining some order.<sup>1,2,3</sup> Experimentally, this was translated by the presence of a broad peak at very low angle in XRD spectra as proof for a layered structure (Figure 1S). The presence of this peak at low angle, demonstrate a layered structure during melting with a basal distance  $d$ , calculated using the Bragg law:  $2d \cdot \sin \theta = \lambda$ , where  $\lambda$  is the incident wavelength of 1.54 Å of Cu  $\lambda_{K\alpha}$ , making the angle  $\theta$  with the surface. The sharp peak in the pristine ionic salt demonstrate a crystalline order which undergo a mesophase transition to a liquid crystal during melting and reaction, and by cooling at the end of the chemical reaction, will be transformed to isotropic form - peak position shifted and broadened (Table S1)

**Table S1.** Basal distance  $d$  (Å) calculated for each system.

|                     |                        |                        |                        |                        |
|---------------------|------------------------|------------------------|------------------------|------------------------|
| CTAB                | Ru@CTAB                | Rh@CTAB                | Ir@CTAB                | Pt@CTAB                |
| 24.37               | 26.35                  | -                      | 24.12                  | 26.27                  |
| CTANTf <sub>2</sub> | Ru@CTANTf <sub>2</sub> | Rh@CTANTf <sub>2</sub> | Ir@CTANTf <sub>2</sub> | Pt@CTANTf <sub>2</sub> |
| 24.12               | 24.71                  | 25.22                  | 24.54                  | 24.98                  |

<sup>1</sup> Scurto, A. M.; Newton, E. Weikel, R. R.; Draucker, L.; Hallet, J.; Liotta, Ch. L.; Leitner, W.; Eckert, Ch. A. *Ind. Eng. Chem. Res.* **2008**, *47*, 493-501;

<sup>2</sup> Kazarian, S. G.; Sakellarios, N.; Gordon, Ch. M. *Chem. Comm.* **2002**, 1314-1315;

<sup>3</sup> Bradley, A. E.; Hardacre, C.; Holbrey, J. D.; Johnston, S.; McMath, S. E.; Nieuwenhuyzen, M. *Chem. Mater.* **2002**, *14*, 629-635.

## Temperature influence in the size of the nanocrystals

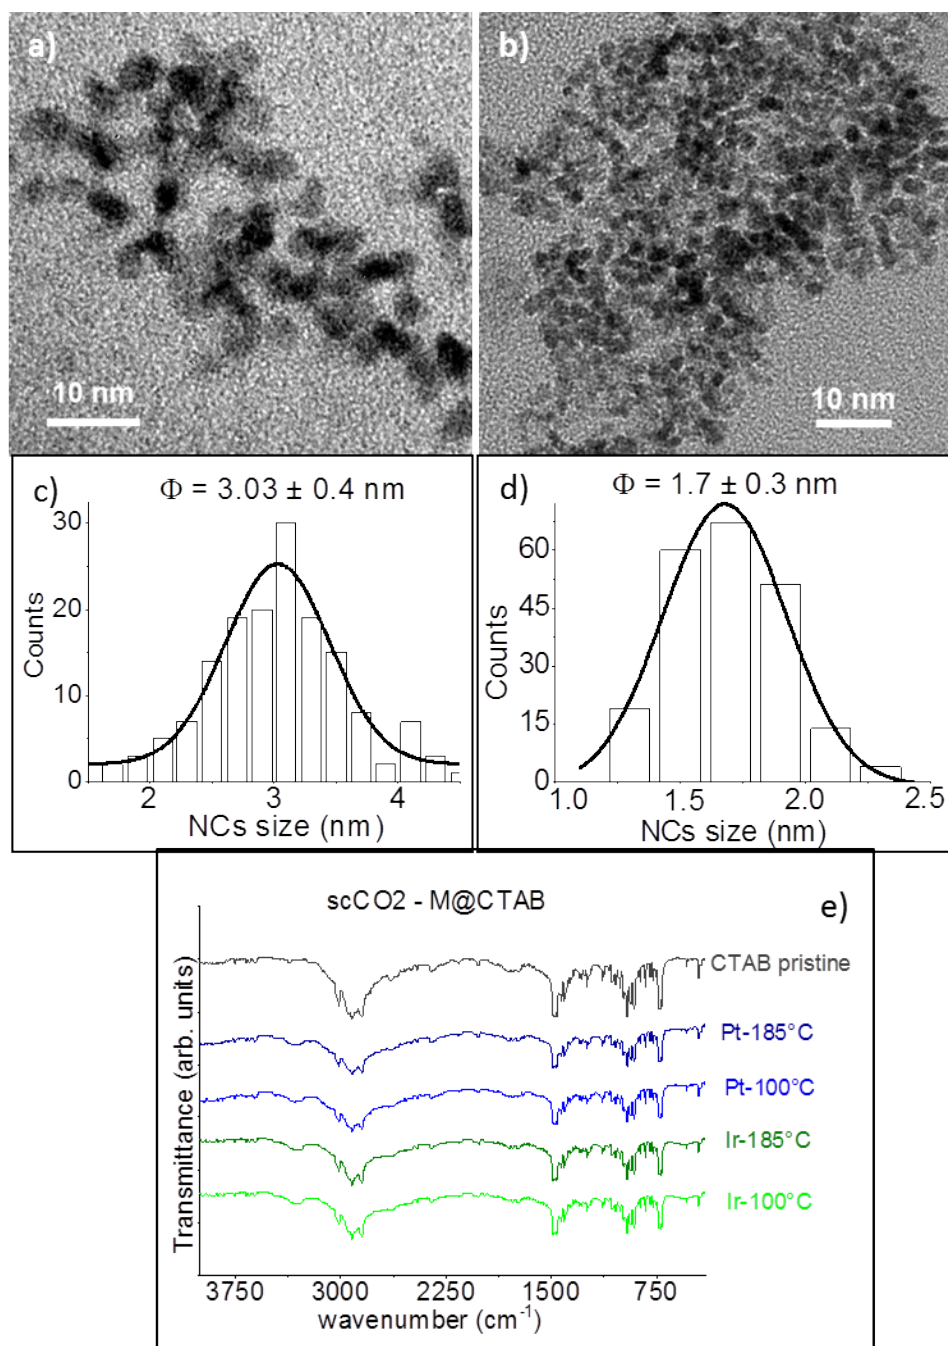

**Figure 2S.** TEM images of Ir@CTAB system prepared at two different reaction temperatures: **a)** at 100°C and **b)** at 185°C with the Gaussian size distribution (**c** and **d**); FTIR analysis of Ir and Pt@CTAB, at the two synthesis temperatures, in comparison with pristine CTAB. No changes in spectra after NCs formation.

## Influence of metal nanocrystals formation and scCO<sub>2</sub> environment over the organic ionic solid structure

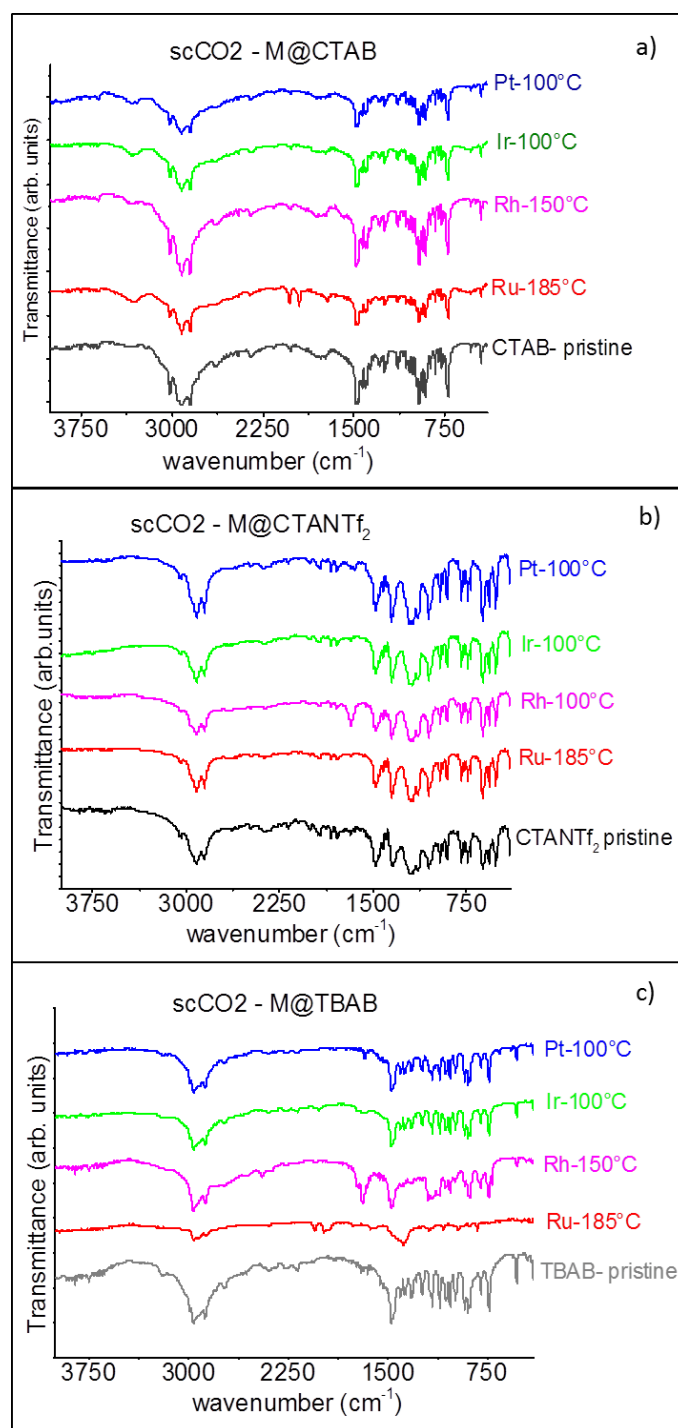

**Figure 3S.** Comparative FTIR spectra of pristine OS and M@OS.

### GC/MS Chromatogram:

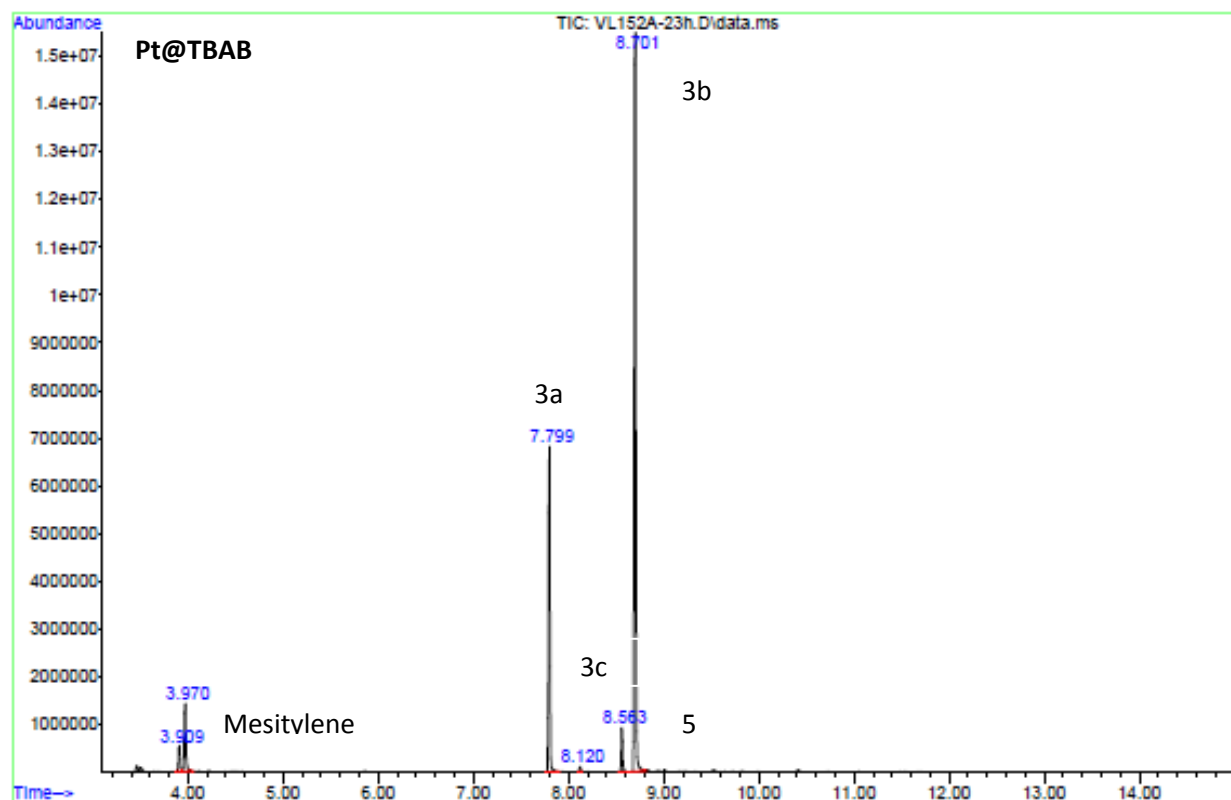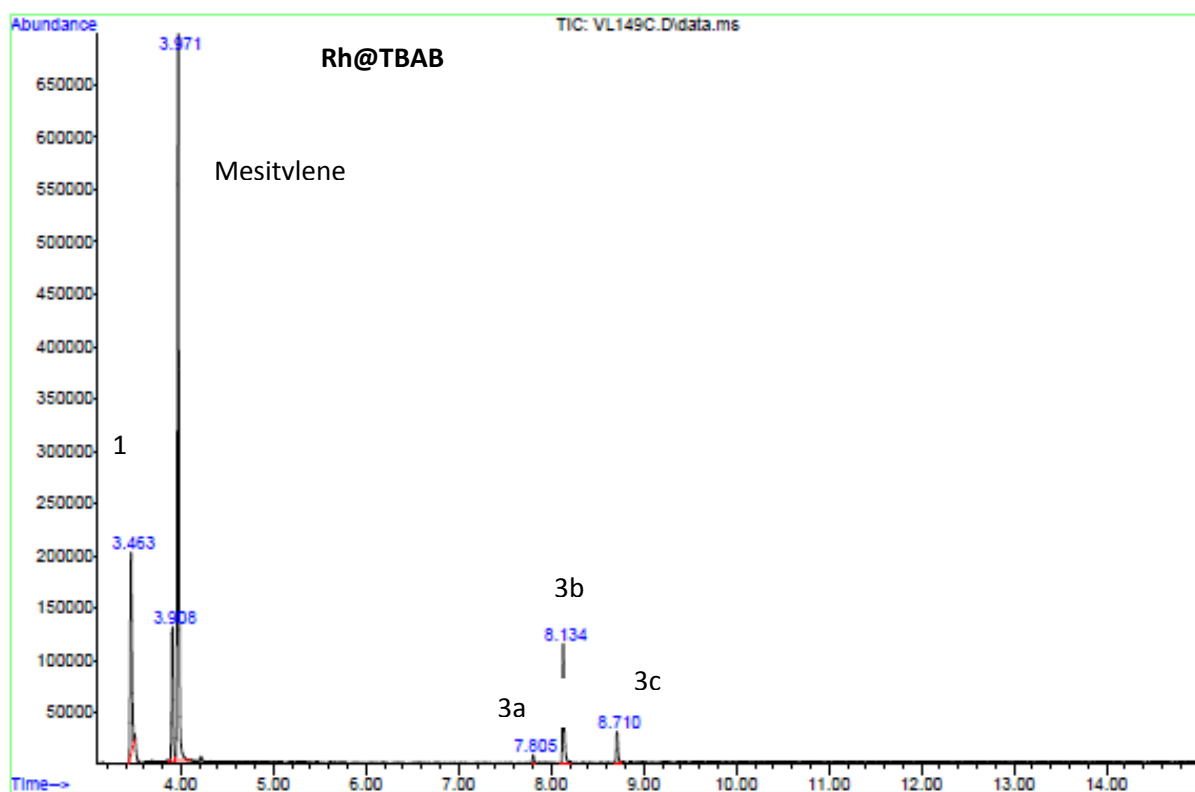

# <sup>1</sup>H NMR Spectra

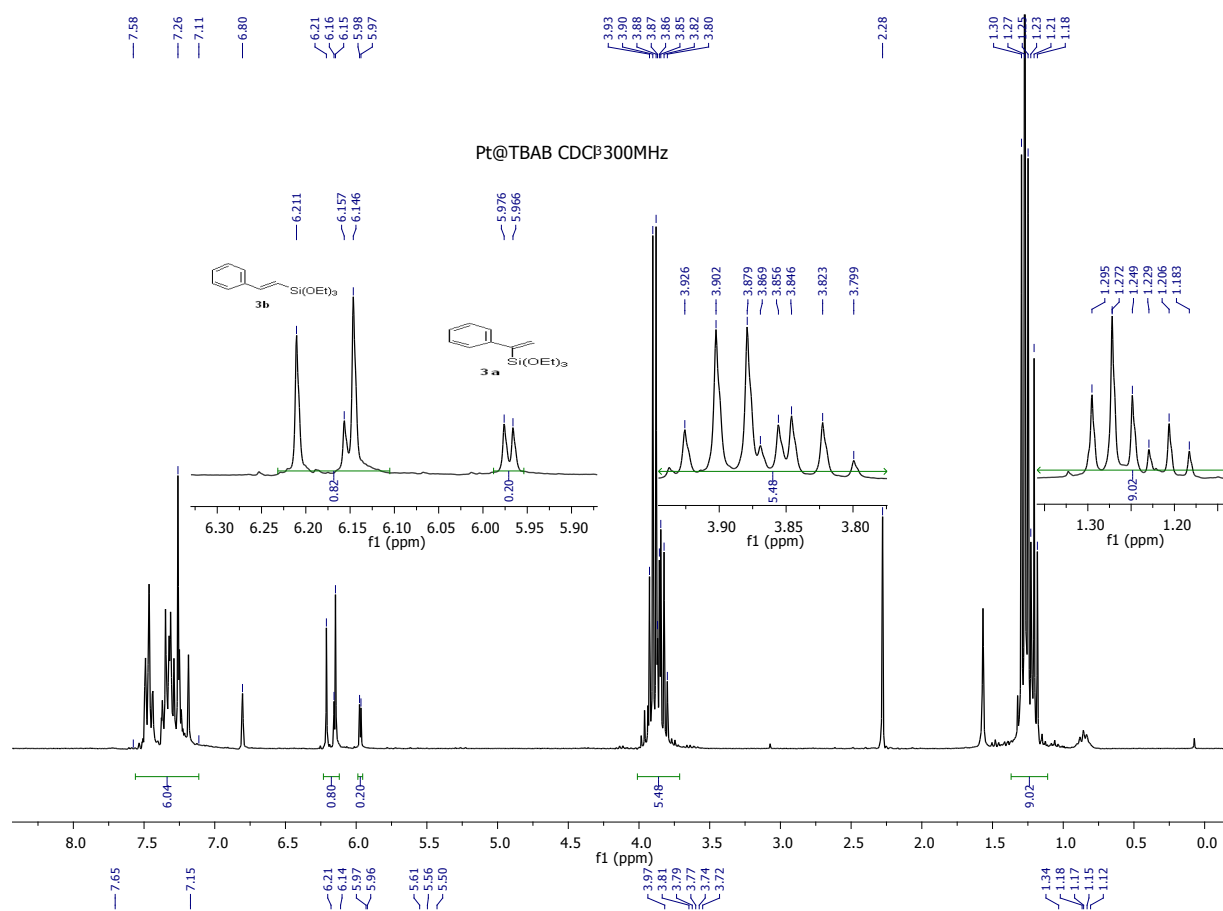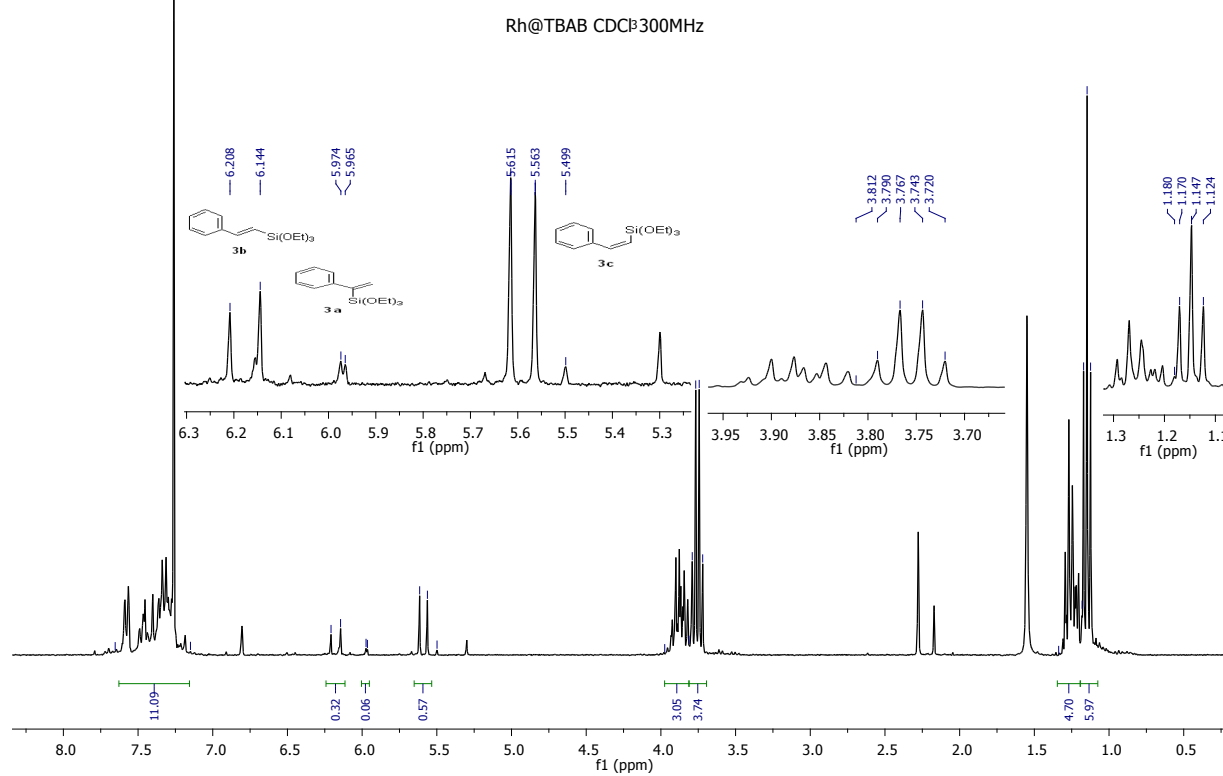

Supplement: c4ra09881a1.pdf [file c4ra09881a1.pdf]
